# Supplementary figures and images for: Evaluation of A-ring fused pyridine d-modified androstane derivatives for antiproliferative and aldo–keto reductase 1C3 inhibitory activity
Source: Royal Society of Chemistry journal article supplement (doi:10.1039/c8md00077h), 2018-01-01

## Michaelis-Menten data

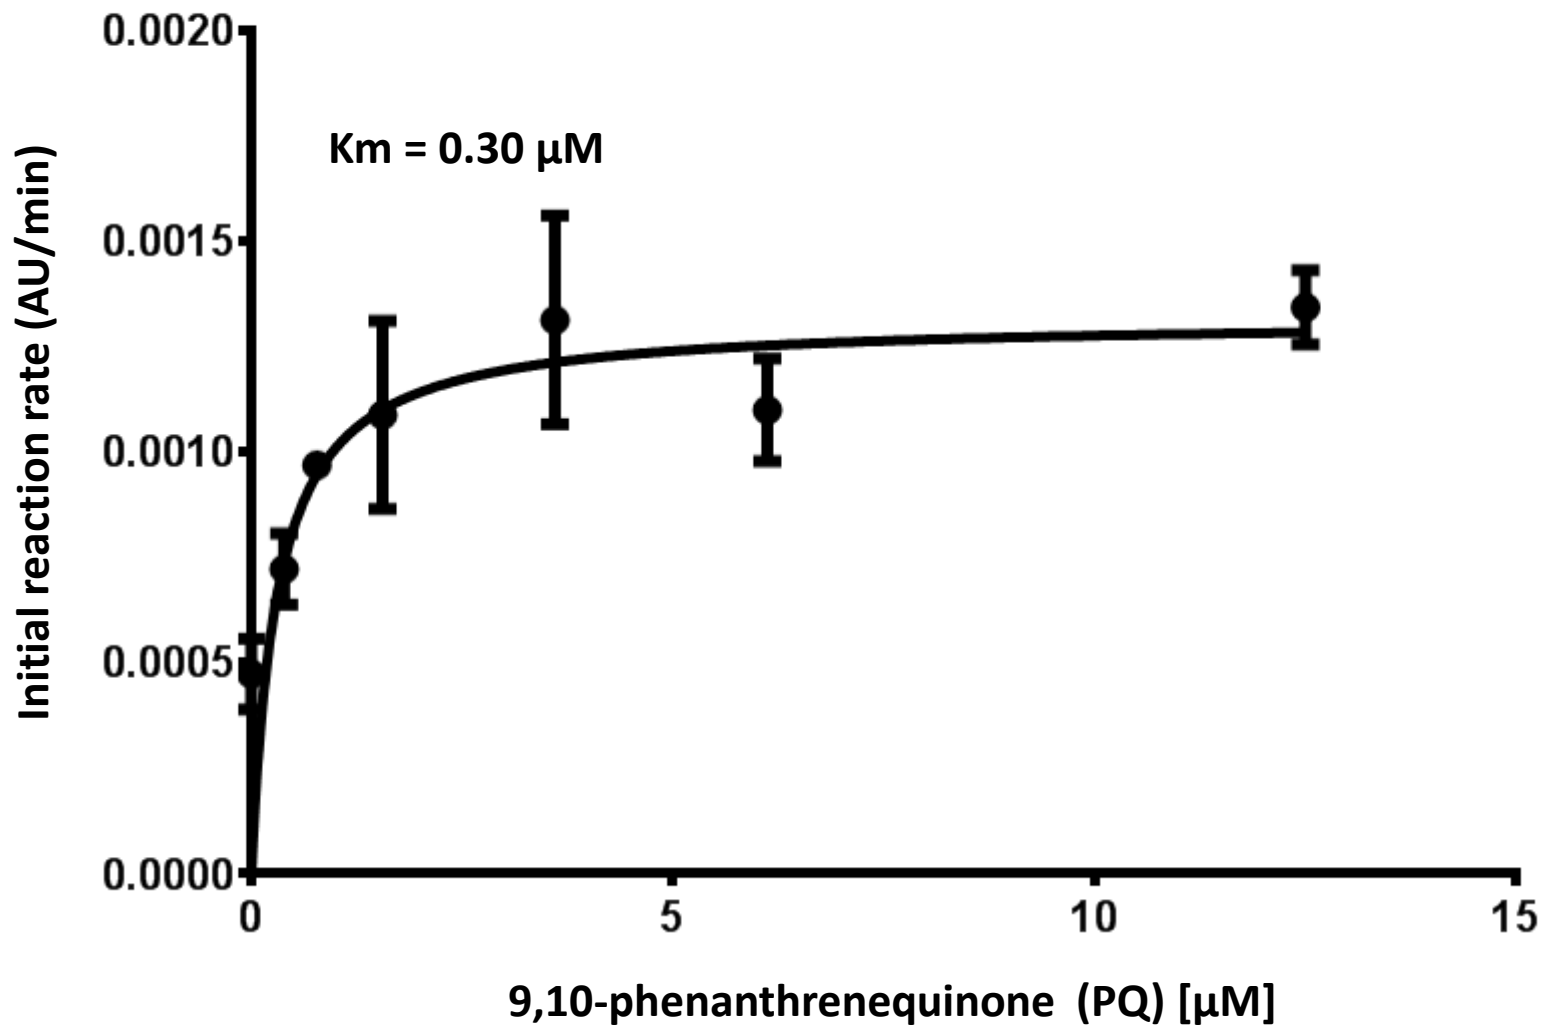

Supplement: c8md00077h1.pdf [file c8md00077h1.pdf]
